# Supplementary material for: One-pot synthesis of novel ligand-free tin(ii)-based hybrid metal halide perovskite quantum dots with high anti-water stability for solution-processed UVC photodetectors
Source: Royal Society of Chemistry journal article supplement (doi:10.1039/d1nr07893c), 2022-01-01
Supplement: d1nr07893c1.pdf [file d1nr07893c1.pdf]

## Supporting Information

# One-pot synthesis of novel ligand-free Tin(II)-based hybrid metal halide perovskite quantum dots with high anti-water stability for solution-processed UVC photodetectors

*Zhenheng Zhang<sup>1</sup>, Shengyi Yang<sup>1,2\*</sup>, Jinming Hu<sup>3</sup>, Hui Peng<sup>1</sup>, Hailong Li<sup>1</sup>, Peiyun Tang<sup>1</sup>, Yurong Jiang<sup>4</sup>, Libin Tang<sup>2</sup>, Bingsuo Zou<sup>5</sup>*

<sup>1</sup>Beijing Key Lab of Nanophotonics and Ultrafine Optoelectronic Systems, School of Physics, Beijing Institute of Technology, Beijing 100081, P. R. China

<sup>2</sup>Kunming Institute of Physics, Kunming 650223, P. R. China

<sup>3</sup>Centre for Artificial-Intelligence Nanophotonics, School of Optical-Electrical and Computer Engineering, University of Shanghai for Science and Technology, Shanghai, 200093, P. R. China

<sup>4</sup>School of Optics and Photonics, Beijing Institute of Technology, Beijing 100081, P. R. China

<sup>5</sup>School of Physical Science and Technology, Guangxi University, Nanning 530004, P. R. China

**KEYWORDS:** Sn-based hybrid metal halide perovskites, ligand-free quantum dots, UVC photodetectors, anti-water stability

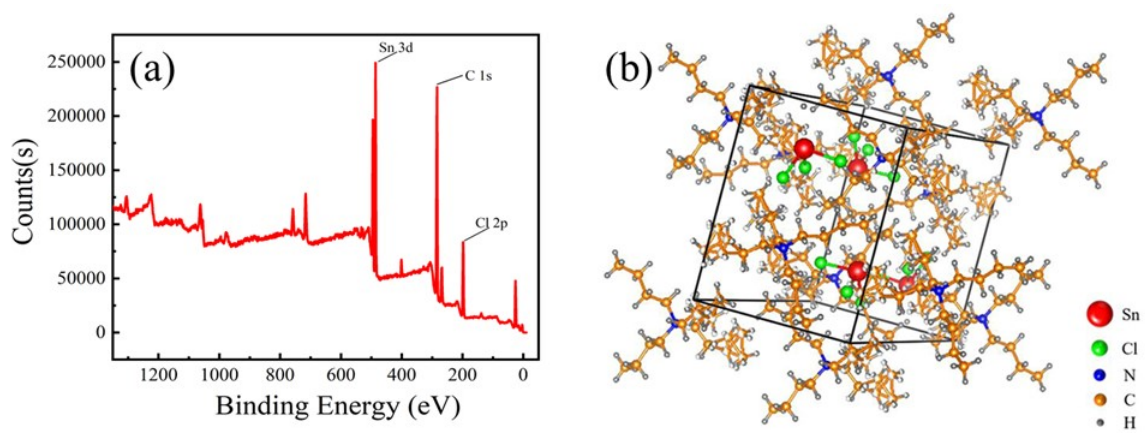

**Figure S1.** (a) XPS of the TBASnCl<sub>3</sub> QDs film; (b) The structure diagram of the TBASnCl<sub>3</sub> QDs.

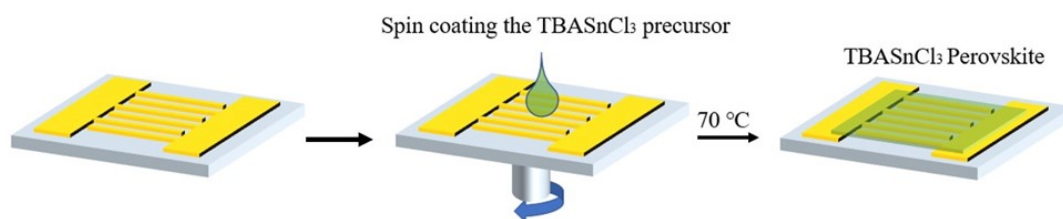

**Figure S2.** Schematic diagrams of the processing procedure for lateral photodetectors Au/TBASnCl<sub>3</sub>/Au.

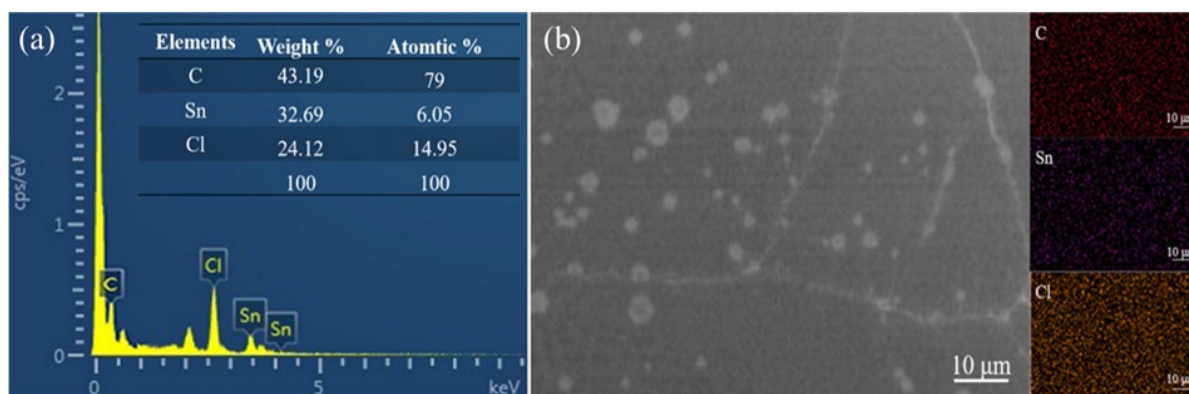

**Figure S3.** (a) EDS and (b) analysis of the TBASnCl<sub>3</sub> QDs film.

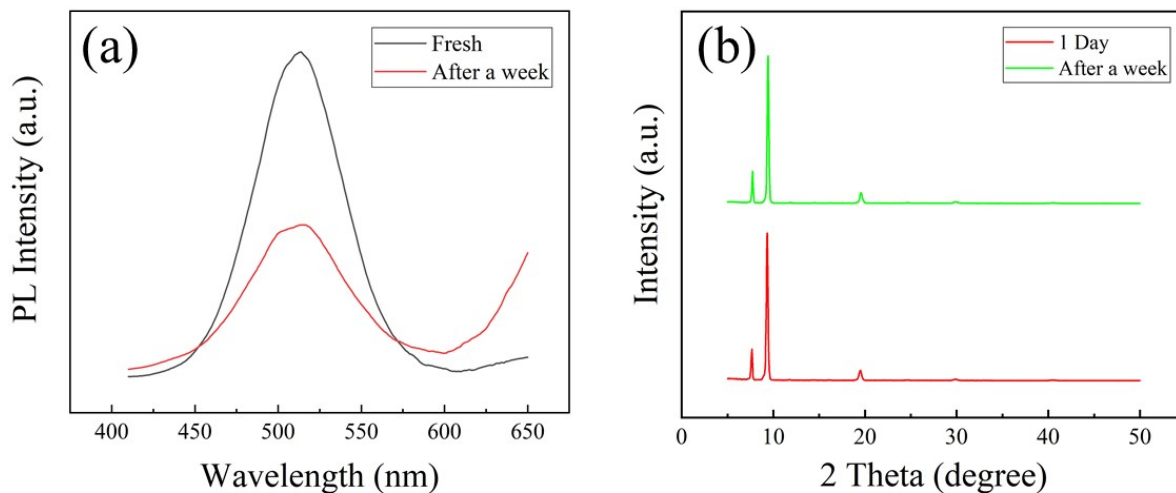

**Figure S4.** (a) PL spectra and (b) XRD patterns of TBASnCl<sub>3</sub> QDs film after depositing in the ambient atmosphere with an air humidity of 60 % just after its fabricating and after one week, respectively.

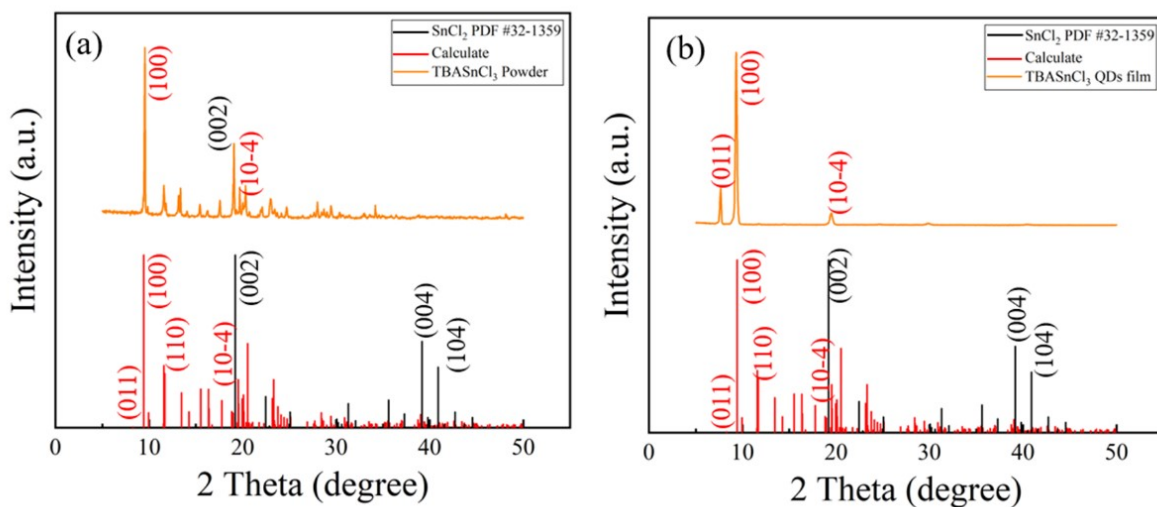

**Figure S5** Experimental and calculated powder X-ray diffraction patterns of the as-prepared TBASnCl<sub>3</sub> powder and TBASnCl<sub>3</sub> thin films on glass surface.

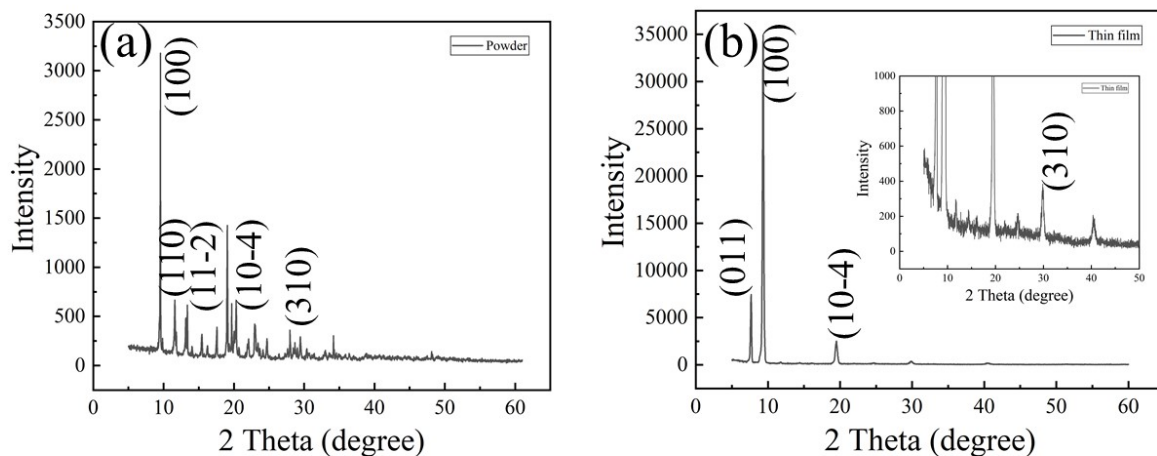

**Figure S6** (a) XRD patterns of the  $\text{TBASnCl}_3$  powder; (b) XRD patterns of  $\text{TBASnCl}_3$  QDs film after annealing at  $70^\circ\text{C}$ . The inset shows the XRD patterns of  $\text{TBASnCl}_3$  QDs film after its magnification.

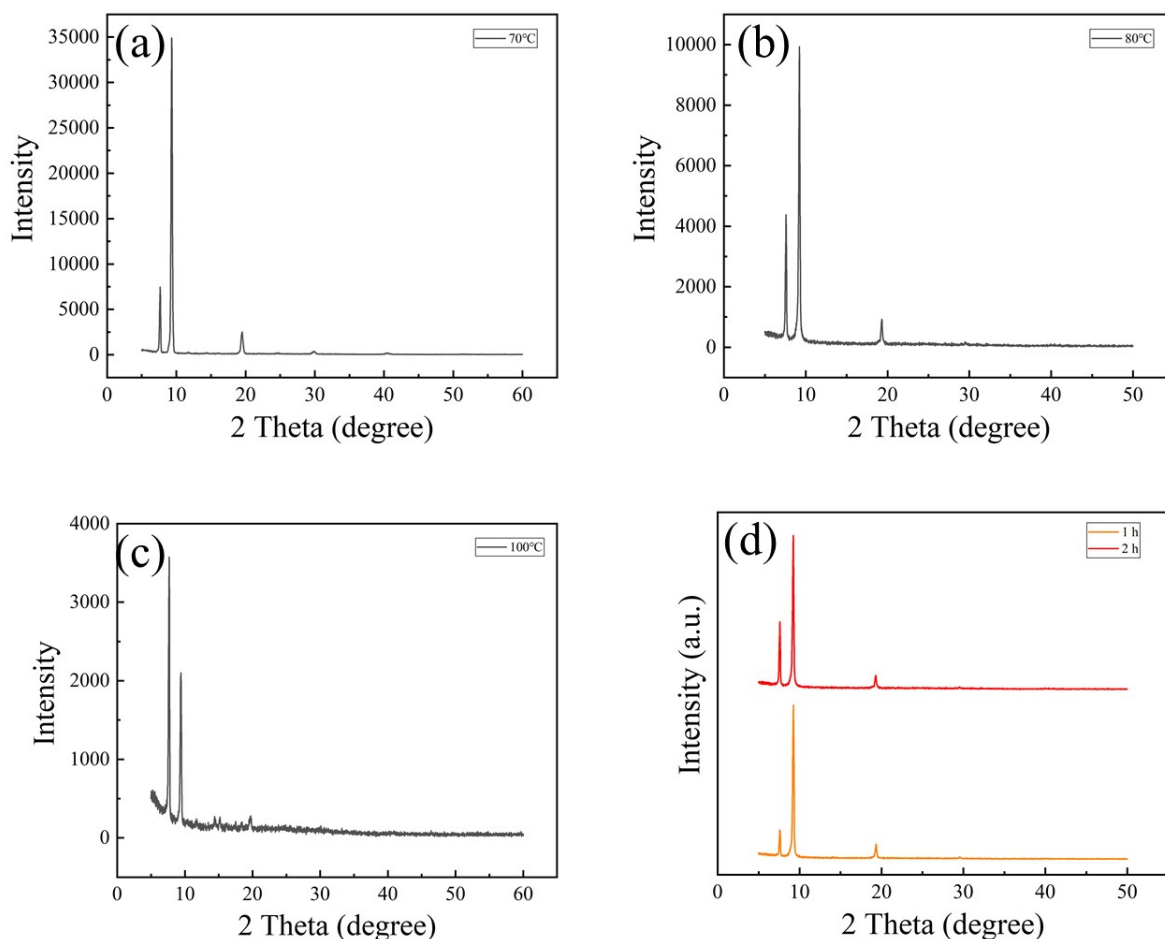

**Figure S7.** XRD patterns of the  $\text{TBASnCl}_3$  QDs film after annealing at different temperature. (a)  $70^\circ\text{C}$ ; (b)  $80^\circ\text{C}$  and (c)  $100^\circ\text{C}$ . (d) XRD patterns of the  $\text{TBASnCl}_3$  QDs film after different annealing times at  $70^\circ\text{C}$ .

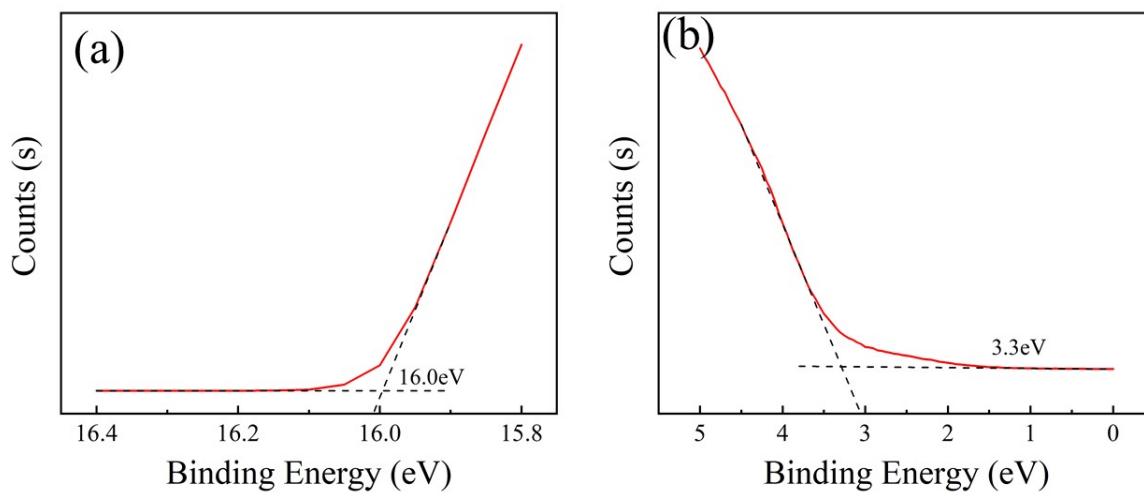

**Figure S8.** UPS spectra of the TBASnCl<sub>3</sub> film. (a) The secondary edge region and (b) the HOMO region of the TBASnCl<sub>3</sub> QDs film.
